# Supplementary material
Source: publisher site journal article supplement (https://www.spandidos-publications.com/5370/downloadSupplementary)
Supplement: Supplementary file 1 [file downloadSupplementary]

## Sheet: Table_S2
Table SII. Results of Kyoto Encyclopedia of Genes and Genomes pathway enrichment analysis for clusters 1 and 2.
A, Cluster 1
#pathway ID	Pathway description	Observed gene count	Background gene count	Strength	False discovery rate	Matching proteins in the network (labels)	Matching proteins in the network (IDs)
hsa04657	IL-17 signaling pathway	6	92	1.12	0.0030	NFKBIA,CEBPB,FOS,S100A8,S100A9,MMP9	9606.ENSP00000216797,9606.ENSP00000305422,9606.ENSP00000306245,9606.ENSP00000357722,9606.ENSP00000357727,9606.ENSP00000361405
hsa05321	Inflammatory bowel disease	4	60	1.13	0.0237	IL18RAP,IFNGR1,IL18R1,TLR5	9606.ENSP00000264260,9606.ENSP00000356713,9606.ENSP00000387211,9606.ENSP00000440643
B, Cluster 2
#pathway ID	Pathway description	Observed gene count	Background gene count	Strength	False discovery rate	Matching proteins in the network (labels)	Matching proteins in the network (IDs)
hsa03010	Ribosome	9	130	1.85	1.03e-12	RPL38,RPLP1,RPS6,RPL14,RPL37A,RPS13,RPL36,RPS28,RPS5	9606.ENSP00000309830,9606.ENSP00000346037,9606.ENSP00000369757,9606.ENSP00000379506,9606.ENSP00000418082,9606.ENSP00000435777,9606.ENSP00000464342,9606.ENSP00000472469,9606.ENSP00000472985
hsa04060	Cytokine-cytokine receptor interaction	4	282	1.16	0.0244	CCR7,CD27,CXCR5,LTB	9606.ENSP00000246657,9606.ENSP00000266557,9606.ENSP00000292174,9606.ENSP00000410481
